# Supplementary material for: Structural, electrical and electrochemical characteristics of La0.1Sr0.9Co1−xNbxO3−δ as a cathode material for intermediate temperature solid oxide fuel cells
Source: Royal Society of Chemistry journal article supplement (doi:10.1039/c4ra02061h), 2014-01-01
Supplement: c4ra02061h1.pdf [file c4ra02061h1.pdf]

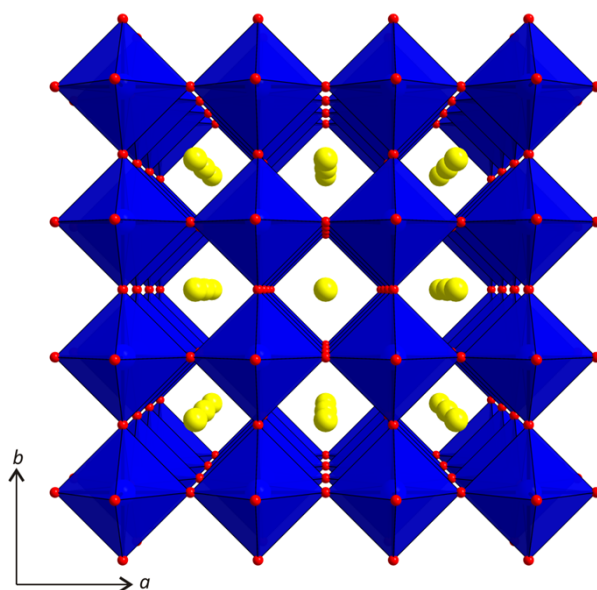

Polyhedral representation of  $\text{La}_{0.1}\text{Sr}_{0.9}\text{Co}_{1-x}\text{Nb}_x\text{O}_3$  in the *ab*-plane (blue, Co(1) or Nb(1); yellow, Sr(1) or La(1); red, O).
